# Supplementary material
Source: publisher site journal article supplement (https://www.dovepress.com/article/597992)
Supplement: Supplementary file 1 [file 597992_Table%20S1.docx]

**SupplementaryTable S1. Baseline characteristics and univariate associations with rehospitalisation at 3, 6 and 12 months**

| Variable | Overall | Rehospitalisation at 3 months, N = 25 (9.8%) | p-value | Rehospitalisation at 6 months, N = 41 (16.1%) | p-value | Rehospitalisation at 12 months, N = 63 (24.7%) | p-value |
| --- | --- | --- | --- | --- | --- | --- | --- |
| Nutritional status | | | | | | | | |
| Malnutrition | - | - | - | - | - | - | - |
| At risk | 125 (49.0%) | 9 (36.0%) | 0.305 | 18 (43.9%) | 0.739 | 32 (50.8%) | 0.929 |
| Moderate malnutrition | 48 (18.8%) | 8 (32.0%) | - | 10 (24.4%) | - | 12 (19.0%) | - |
| Severe malnutrition | 81 (31.8%) | 8 (32.0%) | - | 13 (31.7%) | - | 19 (30.2%) | - |
| Unknown nutritional status | 1 (0.4%) | 0 (0.0%) | - | 0 (0.0%) | - | 0 (0.0%) | - |
| BMI, median [IQR] | 25.30 [22.45–29.15] | 24.50 [21.70–29.60] | 0.851 | 25.00 [22.00–28.00] | 0.569 | 25.70 [22.00–30.15] | 0.766 |
| Albumin, median [IQR] | 32.00 [28.50–35.50] | 31.90 [29.40–35.00] | 0.645 | 33.40 [30.10–35.50] | 0.107 | 32.50 [29.80–35.25] | 0.118 |
| Albumin<35 g/l | 177 (70.0%) | 18 (72.0%) | 0.996 | 27 (65.9%) | 0.660 | 44 (69.8%) | 1.000 |
| Obesity | 53 (20.8%) | 5 (20.0%) | 1.000 | 7 (17.1%) | 0.668 | 15 (23.8%) | 0.615 |
| Comorbidities | | | | | | | | |
| Severe cognitive impairment | 20 (7.8%) | 1 (4.0%) | 0.703 | 2 (4.9%) | 0.750 | 4 (6.3%) | 0.789 |
| History of cancer | 39 (15.3%) | 7 (28.0%) | 0.117 | 7 (17.1%) | 0.913 | 10 (15.9%) | 1.000 |
| Active cancer | 13 (5.1%) | 2 (8.0%) | 0.371 | 2 (4.9%) | 1.000 | 2 (3.2%) | 0.529 |
| CKD stage at discharge, eGFR (ml/min/1.73 m²) | - | - | - | - | - | - | - |
| >90 | 1 (0.4%) | 0 (0.0%) | 0.453 | 0 (0.0%) | 0.619 | 1 (1.6%) | 0.098 |
| 60-89 | 61 (23.9%) | 6 (24.0%) | - | 10 (24.4%) | - | 14 (22.2%) | - |
| 45-59 | 58 (22.7%) | 2 (8.0%) | - | 6 (14.6%) | - | 9 (14.3%) | - |
| 30-44 | 79 (31.0%) | 10 (40.0%) | - | 14 (34.1%) | - | 22 (34.9%) | - |
| 15-29 | 52 (20.4%) | 6 (24.0%) | - | 11 (26.8%) | - | 17 (27.0%) | - |
| <14 | 4 (1.6%) | 1 (4.0%) | - | 0 (0.0%) | - | 0 (0.0%) | - |
| Dyslipidemia | 153 (60.0%) | 14 (56.0%) | 0.830 | 24 (58.5%) | 0.972 | 38 (60.3%) | 1.000 |
| Stroke | 46 (18.0%) | 7 (28.0%) | 0.276 | 10 (24.4%) | 0.351 | 12 (19.0%) | 0.959 |
| PAOD | 17 (6.7%) | 1 (4.0%) | 1.000 | 3 (7.3%) | 0.742 | 6 (9.5%) | 0.449 |
| HF severity & echocardiography | | | | | | | | |
| Amyloidosis | 3 (1.2%) | 0 (0.0%) | 1.000 | 0 (0.0%) | 1.000 | 0 (0.0%) | 1.000 |
| Pacemaker | 42 (16.5%) | 3 (12.0%) | 0.777 | 8 (19.5%) | 0.731 | 14 (22.2%) | 0.221 |
| Aortic stenosis, at least moderate | 42 (16.7%) | 7 (28.0%) | 0.191 | 11 (26.8%) | 0.096 | 13 (20.6%) | 0.405 |
| Mitral regurgitation, at least moderate | 28 (11.2%) | 6 (24.0%) | 0.070 | 10 (24.4%) | 0.008 | 13 (20.6%) | 0.009 |
| Tricuspid regurgitation, at least moderate | 21 (8.4%) | 2 (8.0%) | 1.000 | 1 (2.4%) | 0.215 | 6 (9.5%) | 0.877 |
| Coronary artery disease | - | - | - | - | - | - | - |
| No | 165 (64.7%) | 20 (80.0%) | 0.276 | 31 (75.6%) | 0.154 | 43 (68.3%) | 0.515 |
| Medical treatment | 19 (7.5%) | 0 (0.0%) | - | 0 (0.0%) | - | 2 (3.2%) | - |
| PCI with stent | 62 (24.3%) | 4 (16.0%) | - | 8 (19.5%) | - | 16 (25.4%) | - |
| CABG | 9 (3.5%) | 1 (4.0%) | - | 2 (4.9%) | - | 2 (3.2%) | - |
| Laboratory parameters | | | | | | | | |
| Transferrin saturation, median [IQR] | 14.20 [10.00–20.38] | 13.00 [10.50–14.20] | 0.355 | 13.30 [10.90–21.00] | 0.900 | 13.00 [9.35–18.50] | 0.129 |
| Functional iron deficiency | 69 (28.6%) | 9 (36.0%) | 0.530 | 11 (26.8%) | 0.928 | 18 (28.6%) | 1.000 |
| Anemia (Hb <10 g/dL) | 41 (16.1%) | 3 (12.0%) | 0.776 | 6 (14.6%) | 0.966 | 14 (22.2%) | 0.183 |
| NT-proBNP>5000 pg/ml | 40 (16.0%) | 6 (24.0%) | 0.388 | 10 (24.4%) | 0.171 | 15 (23.8%) | 0.079 |
| Treatments at discharge & follow up | | | | | | | | |
| Type of loop diuretic | - | - | - | - | - | - | - |
| Furosemide | 229 (96.6%) | 22 (88.0%) | 1.000 | 37 (90.2%) | 0.859 | 58 (92.1%) | 0.717 |
| Bumetamide | 8 (3.4%) | 1 (4.0%) | - | 2 (4.9%) | - | 3 (4.8%) | - |
| Anticoagulant | 185 (72.5%) | 17 (68.0%) | 0.764 | 31 (75.6%) | 0.773 | 45 (71.4%) | 0.947 |
| Antiplatelet | 59 (23.1%) | 5 (20.0%) | 0.887 | 7 (17.1%) | 0.422 | 14 (22.2%) | 0.979 |
| RPM follow up | - | - | - | - | - | - | - |
| Patient | 80 (31.4%) | 9 (36.0%) | 0.333 | 13 (31.7%) | 0.857 | 18 (28.6%) | 0.386 |
| Relatives | 83 (32.5%) | 5 (20.0%) | - | 13 (31.7%) | - | 17 (27.0%) | - |
| Private practice nurse | 20 (7.8%) | 1 (4.0%) | - | 2 (4.9%) | - | 5 (7.9%) | - |
| RPM nurse | 72 (28.2%) | 10 (40.0%) | - | 13 (31.7%) | - | 23 (36.5%) | - |
| **Notes**: Supplementary Table S1. Additional baseline characteristics not included in the main Table 1. Continuous variables are presented as median [interquartile range] or mean ± standard deviation, and categorical variables as number (%). Comparisons between patients with and without rehospitalisation at 3, 6, and 12 months were performed using Mann–Whitney U or χ²/Fisher’s exact tests, as appropriate. This supplementary table includes variables of lower prevalence, alternative categorizations (e.g., CKD stages), and echocardiographic or laboratory parameters not retained in the primary table for conciseness.  **Abbreviations**: AS = Aortic Stenosis; CKD = Chronic Kidney Disease; COPD = Chronic Obstructive Pulmonary Disease; eGFR = Estimated Glomerular Filtration Rate; Hb = Hemoglobin; HF = Heart Failure; IQR = Interquartile Range; LVEF = Left Ventricular Ejection Fraction; MR = Mitral Regurgitation; NT-proBNP = N-terminal pro–B-type Natriuretic Peptide; RPM = Remote Patient Monitoring; TR = Tricuspid Regurgitation. | | | | | | | | |
